# mRNA-1273 but not BNT162b2 induces antibodies against polyethylene glycol (PEG) contained in mRNA-based vaccine formulations

Juan Manuel Carreño<sup>1,7&\*</sup>, Gagandeep Singh<sup>1,7\*</sup>, Johnstone Tcheou<sup>1,7</sup>, Komal Srivastava<sup>1,7</sup>, Charles Gleason<sup>1,7</sup>, Hiromi Muramatsu<sup>2</sup>, Parnavi Desai<sup>1,7</sup>, Judith A. Aberg<sup>3</sup>, Rachel L. Miller<sup>4</sup>, PARIS study group<sup>1,7</sup>, Norbert Pardi<sup>2</sup>, Viviana Simon<sup>1,3,5,6,7&</sup>, Florian Krammer<sup>1,6,7&</sup>

PARIS study group: Angela A. Amoako, Dalles Andre, Katherine F. Beach, Maria C. Bermúdez-González, Gianna Y. Cai, Christian Cognigni, Daniel L. Floda, Giulio Kleiner, Neko Lyttle, Wann A Mendez, Lubbertus CF Mulder, Annika Oostenink, Aria Rooker, Ashley Beathrese T. Salimbangon, Miti Saksena, Levy A. Sominsky

## **Affiliations**

<sup>1</sup>*Department of Microbiology, Icahn School of Medicine at Mount Sinai, New York, NY, USA*

<sup>2</sup>*Department of Microbiology, University of Pennsylvania, Philadelphia, PA 19104, USA*

<sup>3</sup>*Division of Infectious Diseases, Department of Medicine, Icahn School of Medicine at Icahn School of Medicine at Mount Sinai, New York, NY, USA*

<sup>4</sup>*Division of Clinical Immunology, Department of Medicine, Icahn School of Medicine at Icahn School of Medicine at Mount Sinai, New York, NY, USA*

<sup>5</sup>*The Global Health and Emerging Pathogens Institute, Icahn School of Medicine at Mount Sinai, New York, NY, USA*

<sup>6</sup>*Department of Pathology, Molecular and Cell Based Medicine, Icahn School of Medicine at Mount Sinai, New York, NY, USA*

<sup>7</sup>*Center for Vaccine Research and Pandemic Preparedness (C-VARPP), Icahn School of Medicine at Mount Sinai, New York, NY, USA*

*\*Contributed equally*

&To whom correspondance should be addressed: Florian Krammer ([florian.krammer@mssm.edu](mailto:florian.krammer@mssm.edu)), Viviana Simon ([viviana.simon@mssm.edu](mailto:viviana.simon@mssm.edu)) and Juan Manuel Carreño ([jm.carreno@mssm.edu](mailto:jm.carreno@mssm.edu))

31 **Abstract**

32  
33  
34  
35  
36  
37  
38  
39  
40  
41  
42  
43  
44  
45  
46  
47  
48  
49  
50  
51  
52  
53  
54  
55  
56  
57  
58  
59  
60  
61  
62  
63

Two messenger RNA (mRNA)-based vaccines are widely used globally to prevent coronavirus disease 2019 (COVID-19). Both vaccine formulations contain PEGylated lipids in their composition, in the form of polyethylene glycol [PEG] 2000 dimyristoyl glycerol for mRNA-1273, and 2 [(polyethylene glycol)-2000]-N,N-ditetradecylacetamide for BNT162b2. It is known that some PEGylated drugs and products for human use that contain PEG, are capable of eliciting immune responses, leading to detectable PEG-specific antibodies in serum. In this study, we determined if any of the components of mRNA-1273 or BNT162b2 formulations elicited PEG-specific antibody responses in serum by enzyme linked immunosorbent assay (ELISA). We detected an increase in the reactivity to mRNA vaccine formulations in mRNA-1273 but not BNT162b2 vaccinees' sera in a prime-boost dependent manner. Furthermore, we observed the same pattern of reactivity against irrelevant lipid nanoparticles from an influenza virus mRNA formulation and found that the reactivity of such antibodies correlated well with antibody levels against high and low molecular weight PEG. Using sera from participants selected based on the vaccine-associated side effects experienced after vaccination, including delayed onset, injection site or severe allergic reactions, we found no obvious association between PEG antibodies and adverse reactions. Overall, our data shows a differential induction of anti-PEG antibodies by mRNA-1273 and BNT162b2. The clinical relevance of PEG reactive antibodies induced by administration of the mRNA-1273 vaccine, and the potential interaction of these antibodies with other PEGylated drugs remains to be explored.

## 64 Introduction

65  
66 Since their introduction, vaccines currently used to prevent coronavirus disease 2019 (COVID-19)  
67 have been extensively scrutinized with regard to their safety profile. Some individuals developed  
68 adverse reactions following the vaccine administration, such as pain, itching, redness, swelling,  
69 and induration at the injection site, or general adverse reactions including cough, diarrhea,  
70 fatigue, fever, and headache (1, 2). These side effects are unpleasant but generally are not  
71 clinically serious. More severe but very rare side effects, including myocarditis and pericarditis  
72 (40 cases per million vaccinated male 12-29 year old vaccinees) have been described (3-5) and  
73 anaphylaxis (0.001 - 0.0001 % of the vaccinated population) also has been reported (2).  
74 Importantly, higher self-reported reactogenicity following administration of mRNA-1273 (from  
75 Moderna) versus BNT162b2 (from Pfizer) has been described (6). Delayed large local reactions,  
76 which are harmless but can be concerning for vaccinees, have been reported specifically to occur  
77 in mostly female vaccinees who received mRNA-1273 (7, 8). However, so far, the cause of these  
78 differences between the two mRNA-based vaccine formulations remains unclear.

79  
80 It is known that some of the excipients contained in different drugs for human use can cause local  
81 or systemic reactions, resulting in the induction of immune responses towards some of these  
82 components (9). Furthermore, it has been suggested that certain components of the mRNA  
83 vaccine formulations might be involved in the development of some of the adverse reactions  
84 observed, including anaphylaxis (2, 9). Pertaining to the structure and composition of the two  
85 mRNA-based vaccine formulations, both vaccines consist of nucleoside-modified mRNA which  
86 encodes a diproline (2P)-stabilized, full-length, membrane-bound spike protein (3). Likewise,  
87 both formulations contain charged and non-charged ionizable lipids, which form the core of the  
88 lipid nanoparticles (LNPs), while 1,2-distearoyl-sn-glycero-3-phosphocholine (DSPC), cholesterol  
89 and a PEGylated lipids, give shape and stabilize the surface lipid bilayer (3) (**Table 1**). Particularly,  
90 polyethylene glycol (PEG) contained in mRNA-based formulations may be linked to some cases  
91 of anaphylaxis (10, 11). Indeed, the US Advisory Committee on Immunization Practices (ACIP)  
92 recommended in the past the exclusion of people with known severe allergic reactions against  
93 PEG and related compounds from receiving vaccine formulations containing these components

94 (12). Both, PEG and polysorbate 80, a component of the adenovirus vectored vaccine AZD1222,  
95 as well as other compounds of similar nature, have been implicated in rare cases of  
96 hypersensitivity reactions (9, 10, 13), and PEG is known to elicit antigen-specific antibody  
97 responses in some individuals (10, 13-15).

98  
99 Given that both of the current mRNA-based vaccine formulations - mRNA-1273 and BNT162b2 -  
100 contain PEG in their composition, but vaccinated individuals display differential reactogenicity,  
101 we evaluated whether serum antibodies from mRNA-based vaccine recipients were able to react  
102 with homologous/heterologous mRNA vaccine formulations. Furthermore, we assessed if  
103 differential patterns of reactivity of antibodies elicited by mRNA-1273 or BNT162b2 were  
104 observed, and assessed the target components within the vaccine formulation.

105  
106  
107  
108  
109  
110  
111  
112  
113  
114  
115  
116  
117  
118  
119  
120  
121  
122

123 **Materials and methods**

124

125 **Study participants and human samples**

126

127 Samples were collected as part of our ongoing institutional review board–approved, longitudinal  
128 observational studies (Study ID-20-00442: 64 participants; Study ID-16-01215: one participant).  
129 The majority of samples were selected from the PARIS (Protection Associated with Rapid  
130 Immunity to SARS-CoV-2) study, which follows healthcare workers (HCWs) of the Mount Sinai  
131 Health System. All participants signed informed consents prior to data and sample collection.  
132 Information on SARS-CoV-2 mRNA vaccine-associated side-effects were collected using a survey  
133 sent to the participants after the first and second vaccine dose. Samples were coded and analyzed  
134 in a blinded manner.

135 Sixty longitudinal samples from 20 PARIS participants (10 BNT162b2 vaccinees and 10 mRNA-  
136 1273 vaccinees) were selected at baseline, 18.9 days (arithmetic mean  $\pm 2.4$  SD) after the first  
137 SARS-CoV-2 mRNA vaccine dose (prime) and 19.3 days (arithmetic mean  $\pm 3.9$  SD) after the  
138 second SARS-CoV-2 mRNA vaccine dose (boost).

139 In addition, we selected longitudinal serum samples collected from participants who reported  
140 experiencing more pronounced, unusual or delayed onset vaccine-associated side effects (7 days  
141 arithmetic mean  $\pm 5.2$  SD) after the first mRNA vaccine dose. The sera were collected at baseline  
142 (n=28 for BNT162b2 and n=19 for mRNA-1273 groups), 14.5 days (arithmetic mean  $\pm 4.8$  SD) after  
143 the prime (n=23 for BNT162b2 and n=17 for mRNA-1273 groups) and 25.2 days (arithmetic mean  
144  $\pm 11.6$  SD) after the boost (n=26 for BNT162b2 and n=17 for mRNA-1273 groups).

145 The SARS-CoV-2 mRNA vaccine side effects reported from the participants selected based on  
146 their vaccine associated side effects were generally mild to moderate and self-limiting (e.g.,  
147 injection site pain/swelling, fever, fatigue, etc.) with a subset of participants (N: 8, all females,  
148 three received BNT162b2 and five received mRNA-1273) reporting delayed onset, injection site  
149 rashes, redness or swelling. Of note, all five participants receive a second vaccine dose and the  
150 delayed onset skin reactions did not re-occur. Sera from a female participant who developed a  
151 severe allergic reaction after the first BNT162b2 vaccine dose requiring hospitalization were also  
152 included. This participant did not receive a second vaccine dose.

153 **Irrelevant mRNA-LNP production**

154 The mRNA used as an irrelevant control was designed based on the influenza virus  
155 B/Colorado/06/2017 neuraminidase (NA) sequence. Production of the mRNA was performed as  
156 described earlier (16, 17). Briefly, the codon-optimized NA gene was synthesized (Genscript) and  
157 cloned into an mRNA production plasmid. A T7-driven *in vitro* transcription reaction (Megascript,  
158 Ambion) using linearized plasmid template was performed to generate mRNA with 101  
159 nucleotide long poly(A) tail. Capping of the mRNA was performed in concert with transcription  
160 through addition of a trinucleotide cap1 analogue, CleanCap (TriLink) and m1 $\Psi$ -5'-triphosphate  
161 (TriLink) was incorporated into the reaction instead of UTP. Cellulose-based purification of NA  
162 mRNA was performed as described (18). The mRNA was then tested on an agarose gel before  
163 storing at -20°C.

164 The cellulose-purified m1 $\Psi$ -containing NA mRNA was encapsulated in LNPs using a  
165 self-assembly process as previously described wherein an ethanolic lipid mixture of ionizable  
166 cationic lipid, phosphatidylcholine, cholesterol and polyethylene glycol-lipid was rapidly mixed  
167 with an aqueous solution containing mRNA at acidic pH (19). The RNA-loaded particles were  
168 characterized and subsequently stored at -80°C at a concentration of 1 mg/ml.

169

170 **Expression and purification of recombinant SARS-CoV-2 spike protein.** Recombinant SARS-CoV-  
171 2 spike protein was produced using a mammalian cell protein expression system. Briefly, the  
172 spike (S) gene sequence (GenBank: MN908947) was cloned into a mammalian expression vector  
173 pCAGGs, as described (20, 21). Protein was expressed using the Expi293 Expression System  
174 (Thermo Fisher Scientific), according to the manufacturer's instructions. Cell culture supernatant  
175 was collected and clarified by centrifugation at 4000 x g, filtered, and purified with Ni-  
176 nitrilotriacetic acid (NTA) agarose (QIAGEN). The purified protein was concentrated using Amicon  
177 Ultracell (Merck Millipore) centrifugation units, and the buffer was exchanged to a phosphate  
178 buffer solution (PBS, pH 7.4). Proteins were stored at -80°C until use.

179

180 **Enzyme linked immunosorbent assay (ELISA).** Antibody titers in vaccinees' sera were  
181 determined against the recombinant trimeric spike protein of wild type SARS-CoV-2 as previously  
182 described (21, 22). Spike and BSA ELISAs were performed using phosphate-buffered saline (PBS)

183 with 0.1% Tween-20 (PBS-T; Fisher Scientific) in washing, blocking, and diluting solutions. mRNA  
184 vaccines BNT162b2 (from Pfizer) and mRNA-1273 (from Moderna), irrelevant mRNA LNPs, multi-  
185 PEGylated bovine serum albumin (mPEG-BSA, 20 kDa, Life Diagnostics, Inc), and low molecular  
186 weight PEG (3.35kDa, Sigma) based ELISAs were performed using a modified protocol in which  
187 Tween-20 was excluded from washing/Ab solutions. Briefly, polystyrene 96-well microtiter plates  
188 (Thermo Fisher Scientific) were coated overnight with mPEG-BSA (2 $\mu$ g/ml), BNT162b2 or mRNA-  
189 1273 vaccine formulations (25 $\mu$ l/10ml), irrelevant mRNA lipid nanoparticles (0.5 $\mu$ g/ml) or BSA  
190 (1% solution, MP Biomedicals). For IgE and BSA controls (shown in Supplementary Figure 2), ELISA  
191 plates were coated with 2 $\mu$ g/ml of an IgE isotype control (Invitrogen) and BSA (1% solution, MP  
192 Biomedicals) respectively. The following day, wells were washed and blocked with 200  $\mu$ l of 3%  
193 non-fat milk (AmericanBio) in PBS for 1 h at room temperature (RT). After 1 h incubation, blocking  
194 solution was removed and pre-diluted sera (in PBS 1% non-fat milk) were added at an initial  
195 dilution of 1:50 followed by 2-fold serial dilutions. After 2 h incubation, plates were washed three  
196 times with PBS and then incubated for 1 hour with anti-human IgG (Fab-specific) horse radish  
197 peroxidase (HRP) secondary antibody produced in goat (Sigma-Aldrich), or IgM-HRP (Southern  
198 Biotech) at a 1:3000 in 1% milk PBS. Specific spike/PEG-IgE antibodies were assessed by  
199 incubating with an anti-IgE HRP conjugated antibody (Invitrogen) for 1 h at a 1:2000 dilution. For  
200 the IgE control, plates were incubated with serial dilutions (2-fold) of the anti-IgE HRP conjugated  
201 antibody (Invitrogen) starting at a 1:1000 dilution for 1 h. For the BSA control, plates were  
202 incubated with serial dilutions (2-fold) of an anti-albumin (bovine serum) rabbit IgG fraction (anti-  
203 BSA, Invitrogen) starting at a 1:1000 dilution for 1 h, followed by three washes with PBS and  
204 addition of a donkey anti-rabbit IgG HRP conjugated antibody (CiteAb) at a 1:1000 dilution. Plates  
205 were washed three times with PBS and 100 $\mu$ l/well of *O*-phenylenediamine dihydrochloride (OPD)  
206 substrate (SigmaFast OPD; Sigma-Aldrich) were added. After 10 min incubation at RT, the  
207 reaction was stopped by addition of 50  $\mu$ l of 3 M HCl solution. The optical density (OD) was  
208 measured at 490 nm using a Synergy 4 plate reader (BioTek). Data were captured in excel and  
209 are area under the curve (AUC) values were determined using Prism 9 (GraphPad Software, San  
210 Diego, CA, USA).

211 **Statistical analyses.** Data plotting and statistical analyses were performed using GraphPad Prism  
212 9 (GraphPad Software, San Diego, CA, USA). Statistically significant differences between post-  
213 prime/post-boost vs baseline antibody levels were measured using a one-way ANOVA with  
214 Tukey's multiple comparisons test. All adjusted P values of <0.05 were considered statistically  
215 significant with a confidence interval of 95%.

216

## 217 **Results**

218 **mRNA-1273 vaccination induces antibodies against mRNA vaccine formulations in a prime-**  
219 **boost dependent manner.** It has been hypothesized that the adverse reactions observed in some  
220 individuals after administration of the currently available mRNA vaccines might be caused by  
221 some of the formulation components (2, 11). To explore if vaccinees elicited antibodies against  
222 components of the vaccine formulation, we used samples from individuals who received either  
223 the mRNA-1273 or BNT162b2 mRNA vaccines. Samples were collected at baseline (n=10/group),  
224 18.9 days (arithmetic mean  $\pm$ 2.4 SD) after the prime (n=10/group) or 19.3 days (arithmetic mean  
225  $\pm$ 3.9 SD) after the boost (n=10/group). Initially, to confirm the induction of antibodies after the  
226 vaccine administration, we measured the IgG titers against a recombinant version of the spike  
227 protein via ELISA. We detected a prime-boost dependent induction of anti-spike antibodies after  
228 vaccination, with levels oscillating around  $10^3$  area under the curve (AUC) units after prime with  
229 mRNA-1273 or BNT162b2, and  $10^4$  after the boost administration (Figs. **1A** and **1B**). Then, we  
230 coated ELISA plates with a standard amount of each of the vaccine formulations resuspended in  
231 PBS and assessed binding of IgG antibodies. We found that sera collected after vaccination with  
232 mRNA-1273 had increasing reactivity against both the BNT162b2 (Fig. **1C**) and mRNA-1273 (Fig.  
233 **1D**) formulations, and that the increased reactivity was vaccination-dependent, with a moderate  
234 increase after the prime administration and higher levels induced after the boost. Interestingly,  
235 this increase in reactivity was not evident in sera from individuals receiving the BNT162b2  
236 vaccine, either against the BNT162b2 or mRNA-1273 formulations (Figs. **1E** and **1F**). Overall, these  
237 data suggest that mRNA-1273 but not BNT162b2 vaccination induces antibodies against some  
238 component(s) of the vaccine formulations.



239 **Antibodies reactive towards the vaccine formulation are directed against the lipid**  
240 **nanoparticles and react with polyethylene glycol (PEG).** Lipid nanoparticles contained in the  
241 currently used mRNA vaccine formulations, as well as other drugs and other cosmetic and health  
242 products for human use, contain PEG and have the potential to elicit immune responses against  
243 it (10, 13-15). To dissect the target within the vaccine formulation to which mRNA-1273-induced  
244 antibodies bind, we coated ELISA plates with LNPs carrying a SARS-CoV-2 unrelated, irrelevant  
245 mRNA (encoding influenza virus neuraminidase). Similar to the reactivity overserved against the  
246 BNT162b2 and mRNA-1273 formulations, we detected an increase in the reactivity against the  
247 irrelevant mRNA-LNPs in individuals receiving the mRNA-1273 vaccine (Fig. **2B**), but not in those  
248 ones vaccinated with BNT162b2 (Fig. **2A**), suggesting the reactivity is independent of the  
249 sequence of the mRNA contained in the formulation.

250  
251 Next, we assessed whether vaccination induced antibodies reacted to PEG. We measured the  
252 binding of sera from mRNA-1273 and BNT162b2 vaccinated individuals to a PEGylated form of  
253 BSA (PEG-BSA) containing high molecular weight PEG (20kDa). Again, we found that individuals  
254 vaccinated with mRNA-1273, had an increase in antibodies against PEG-BSA in a vaccination-  
255 dependent manner (Fig. **2D**), whereas no significant increase of antibody titers in individuals  
256 receiving the BNT162b2 vaccine was observed (Fig. **2C**). As an alternative experimental approach,  
257 we coated high binding polystyrene plates directly with a low molecular weight PEG (3.35 kDa)  
258 molecule and performed similar ELISAs. Although this method seemed to be less sensitive than  
259 the PEG-BSA ELISA, similarly we observed that individuals vaccinated with mRNA-1273, had  
260 increased reactivity to PEG, particularly after the boost (Fig. **2E**), but there was no increase in  
261 antibody titers following BNT162b2 administration (Fig. **2F**). Overall, these results suggest that  
262 the antibodies induced towards the vaccine formulation components may be directed against  
263 PEG, which is present in the vaccine formulation.

264  
265 **PEG as the target of mRNA-1273-induced antibodies.** To assess in a systematic manner if the  
266 formulation-reactive antibodies induced in mRNA-1273 vaccine recipients were directed against  
267 PEG, we performed correlation analyses using the AUC values obtained in the different ELISAs

268 performed. We found that the mRNA-1273 induced antibodies detected against the BNT162b2  
269 (Fig. **3A**) or mRNA-1273 (Fig. **3B**) vaccine formulations not only correlated well with PEG as  
270 measured by using PEGylated BSA, but a correlation was observed between the PEGylated-BSA  
271 AUC values and the irrelevant mRNA-LNPs (Fig. **3C**), as well as with the low molecular weight PEG  
272 (3.35kDa) AUCs (Fig. **3D**). Moreover, the independent correlation of PEGylated-BSA AUC values  
273 vs the BNT162b2 or mRNA-1273 formulation, the irrelevant mRNA-LNPs, or the low molecular  
274 weight PEG AUCs, increased in a prime-boost dependent manner, with the lowest correlation  
275 observed at baseline, and increasing correlations after the prime, followed by high correlations  
276 after the boost (Supplementary Fig. **1**). The absolute values of the geometric mean AUCs for every  
277 ELISA and the fold induction after the prime or the boost are shown in **Table 2**. Overall, these  
278 analyses support that the antibodies detected in mRNA-1273 vaccine recipients, which react  
279 towards the BNT162b2 or mRNA-1273 vaccine formulations, are directed towards the PEG  
280 component of the formulations.

281  
282 To explore if vaccinees displayed other classes of anti-PEG antibodies, we measured the reactivity  
283 of IgM using the PEGylated BSA based ELISA. Similar to the IgG pattern previously observed, we  
284 detected PEG-specific IgM - although at low levels - in the mRNA-1273 recipients in a vaccination  
285 dependent manner (Fig. **4B**), however no induction of IgM in the BNT162b2 vaccinees (Fig. **4A**).  
286 Moreover, we assessed whether individuals could potentially induce IgE antibodies directed to  
287 PEG in response to vaccination, however levels of PEG-specific IgE were undetectable in all the  
288 participants, irrespective of the vaccine type received (Figs. **4C** and **4D**). As a control for IgE  
289 detection, we used plates coated with house dust mite (HDM) antigens, which allowed detecting  
290 IgE in some of the participants (Supplementary Fig. **2**). Moreover, as a control to ensure that the  
291 anti-PEG antibodies detected through this work were directed specifically against PEG, and  
292 exclude the possibility that the BSA contained in the PEG-BSA reagent was as a target of the  
293 reactivity detected, we performed ELISAs in plates pre-coated with 1% BSA (Figs. **4E** and **4F**). We  
294 detected residual reactivity in three individuals, although at levels very close to the limit of  
295 detection. These residual antibodies were, however, detected in both the BNT162b2 and mRNA-  
296 1273 groups, and were irrespective of the vaccination time point. Overall, these results indicate

297 that mRNA-1273 administration leads to the induction of specific IgG and IgM, but not IgE  
298 antibodies against PEG.

299

300 **Anti-PEG antibodies in a subgroup of participants with reported vaccine associated side effects**  
301 **including delayed onset, injection site rash/erythema or severe allergic reaction.** A small  
302 proportion of individuals have experienced delayed large local reactions after receiving the  
303 mRNA-1273 vaccine (7, 8). To assess whether individuals who experienced delayed onset  
304 reactions or other types of adverse reactions following vaccination, mounted differential anti-  
305 PEG antibodies at baseline or after vaccination, we used samples from a selection of study  
306 participants that reported vaccine-associated side effects such as delayed onset reactions  
307 including injection site rashes (N=8) or severe allergic reaction (N=1). Overall, although levels of  
308 anti-PEG antibodies were slightly higher at baseline, we did not find a significant association  
309 between baseline anti-PEG titers and antibody induction after vaccination with mRNA-1273 or  
310 BNT162b2. However, individuals receiving the mRNA-1273 formulation (Fig. **5B**), but not the ones  
311 receiving the BNT162b2 vaccine (Fig. **5A**), induced significantly higher levels of anti-PEG  
312 antibodies in a vaccination-dependent manner, similar to the findings described above. In  
313 summary, these findings indicate that although there is an increase in the anti-PEG antibodies in  
314 the mRNA-1273 vaccinees, there was no obvious association between PEG antibodies and  
315 adverse reactions. Pre-existing anti-PEG levels are not associated with a more robust PEG  
316 antibody induction following vaccination.

317  
318  
319  
320  
321  
322  
323  
324  
325  
326  
327  
328  
329  
330

331 **Discussion**

332  
333 Some of the current vaccines to prevent COVID-19 have unique properties as compared to any  
334 other licensed vaccines in history. They are based on mRNA encapsulated in lipid nanoparticles  
335 and they do not contain the target antigen which is coded by the mRNA and produced in the  
336 vaccinee's cells. The LNPs contain lipidic components of diverse nature including PEGylated lipids.  
337 Polyethylene glycol (PEG) is found in different drugs, cosmetics and health products for human  
338 use (10, 23). Administration of animals with PEGylated proteins of different nature can induce  
339 PEG-specific antibodies (24). Likewise, humans are able to induce anti-PEG antibodies following  
340 administration of certain PEGylated drugs (14, 25-27). Moreover, pre-existing anti-PEG  
341 antibodies are present in some individuals and can interfere with activities of PEGylated drugs  
342 (15, 28).

343  
344 Here, we found that a proportion of study participants receiving SARS-CoV-2 mRNA vaccines  
345 mount anti-PEG antibodies to variable levels. Not every study participant receiving the mRNA-  
346 1273 vaccine displayed high levels of anti-PEG antibodies post-vaccination, and not every  
347 individual experiencing delayed onset side effects such as injection site reactions post-  
348 vaccination had pre-existing anti-PEG levels. This suggests that although PEG contained in the  
349 mRNA-1273 vaccine formulation is recognized by the immune system and antibodies are induced  
350 against this molecule in some of the vaccinees, such high levels of antibodies – either at baseline  
351 or induced by vaccination – do not directly correlate with the emergence of delayed large local  
352 reactions. Although we cannot establish an association between the levels of PEG-reactive  
353 antibodies and the higher reactogenicity observed in mRNA-1273 vaccinees, our findings suggest  
354 that perhaps anti-formulation immune responses are contributing to the higher reactogenicity  
355 sometimes observed with mRNA-1273 compared to BNT162b2.

356  
357 The pre-existing antibody levels against PEG could be due to previous exposures to PEGylated  
358 drugs (14, 25-27) or PEG-containing products (23). Importantly, we assessed the presence of  
359 spike- or PEG- specific IgE antibodies and we did not find detectable levels of IgE antibodies,  
360 including in the one participant who experienced a severe allergic reaction in response to

361 vaccination. Our results are in line with previous findings detecting PEG-specific IgG following  
362 vaccination, but a lack of IgE (29). Allergy skin testing to PEG also was negative (unpublished  
363 data). Immediate allergic reactions following vaccination, such as anaphylaxis, are likely to be  
364 mediated by IgE-independent mechanisms of diverse nature (29), and the relevance of PEG-  
365 specific IgG induced by vaccination remains to be investigated. Interestingly, via a genome-wide  
366 association study, an immunoglobulin heavy chain (IGH) locus has been associated with the anti-  
367 PEG IgM response (30). Although such association was not present for IgG, IGH polymorphisms  
368 associated with switched anti-PEG IgG subsets require further exploration.

369  
370 Differential immunogenicity of PEG molecules containing a methoxy (mPEG), hydroxy (H)-PEG  
371 or t-butoxy (t-BuO-PEG) distal terminal groups has been described, with mPEG being more prone  
372 to induce specific responses against this terminal group (31). Notwithstanding, the majority PEG-  
373 specific monoclonal antibodies (mAbs) recognize the backbone of the molecule, meaning the  
374 repeated ethylene oxide subunits (28, 32-34). Although the currently used mRNA formulations  
375 incorporate different forms of PEG, both the polyethylene glycol [PEG] 2000 dimyristoyl glycerol  
376 contained in the mRNA-1273 formulation, and the 2 [(polyethylene glycol)-2000]-N,N-  
377 ditetradecylacetamide contained in the BNT162b2 formulation, bear a methoxy terminal group.  
378 Hence, it is unlikely that the differential patterns of anti-PEG antibodies detected in mRNA-1273  
379 vs BNT162b2 vaccinee's sera, are due to PEG structural differences in the formulations, but  
380 rather, this might be the result of the higher dose of mRNA given to mRNA-1273 vaccine  
381 recipients - 100µg for mRNA-1273 vs 30µg for BNT162b2, the result of the higher PEGylated lipid  
382 dose in mRNA-1273 or the way PEG is presented by the carrier lipid (35). Moreover, serum from  
383 mRNA-1273 vaccine recipients was able to recognize components of both formulations in a  
384 prime-boost dependent manner. It remains to be explored whether the anti-PEG antibodies  
385 induced following vaccination are directed towards the backbone of the PEG molecule, or the  
386 methoxy group present in PEG from both formulations. Overall, our study reports the induction  
387 of PEG antibodies following administration of one of the currently used mRNA-based vaccine  
388 formulation. The clinical relevance of PEG-reactive antibodies induced by mRNA-1273

389 administration and the potential interaction of these antibodies with other PEGylated drugs  
390 remain to be explored.

391

### 392 **Acknowledgments**

393 We thank the study participants for their generosity and willingness to participate in longitudinal  
394 COVID-19 research studies. None of this work would be possible without their contributions.

395 This work is part of the PARIS/SPARTA studies funded by the NIAID Collaborative Influenza  
396 Vaccine Innovation Centers (CIVIC) contract 75N93019C00051. In addition, this work was also  
397 partially funded by NIAID U19AI168631-01 and the Centers of Excellence for Influenza Research  
398 and Surveillance (CEIRS, contract # HHSN272201400008C), the JPB Foundation, the Open  
399 Philanthropy Project (research grant 2020-215611 (5384) and by anonymous donors. Finally, this  
400 effort was also supported by the Serological Sciences Network (SeroNet) in part with Federal  
401 funds from the National Cancer Institute, National Institutes of Health, under Contract No.  
402 75N91019D00024, Task Order No. 75N91021F00001. The content of this publication does not  
403 necessarily reflect the views or policies of the Department of Health and Human Services, nor  
404 does mention of trade names, commercial products or organizations imply endorsement by the  
405 U.S. Government. We thank Acuitas Therapeutics for LNP-encapsulating the NA mRNA used in  
406 this study.

407

### 408 **Conflict of interest statement**

409 The Icahn School of Medicine at Mount Sinai has filed patent applications relating to SARS-CoV-  
410 2 serological assays and NDV-based SARS-CoV-2 vaccines which list Florian Krammer as co-  
411 inventor. Viviana Simon is also listed on the serological assay patent application as co-inventor.  
412 Mount Sinai has spun out a company, Kantaro, to market serological tests for SARS-CoV-2. Florian  
413 Krammer has consulted for Merck and Pfizer (before 2020), and is currently consulting for Pfizer,  
414 Seqirus, 3<sup>rd</sup> Rock Ventures, Merck and Avimex. The Krammer laboratory is also collaborating with  
415 Pfizer on animal models of SARS-CoV-2.

416

417

418 **Author contributions:**

419 F.K., V.S. and J.M.C. conceptualized study; CG, KS and the PARIS study group enrolled participants,  
420 collected data, evaluated surveys and provided biospecimen and metadata, G.S., J.M.C, C.G.,  
421 H.M., J.T., P.D. and the PARIS study group performed experiments; J.M.C., G.S., and J.T. analyzed  
422 data; J.M.C., V.S., and F.K. administered the project; F.K., V.S., and N.P. provided resources; J.M.C.  
423 wrote original draft. All authors reviewed, edited and approved the final version of the  
424 manuscript, and have had access to the raw data.

425

426 **References**

427

- 428 1. Chen M, Yuan Y, Zhou Y, Deng Z, Zhao J, Feng F, et al. Safety of SARS-CoV-2 vaccines: a  
429 systematic review and meta-analysis of randomized controlled trials. *Infect Dis Poverty*.  
430 2021;10(1):94.
- 431 2. Castells MC, Phillips EJ. Maintaining Safety with SARS-CoV-2 Vaccines. *N Engl J Med*.  
432 2021;384(7):643-9.
- 433 3. Buschmann MD, Carrasco MJ, Alishetty S, Paige M, Alameh MG, Weissman D.  
434 Nanomaterial Delivery Systems for mRNA Vaccines. *Vaccines (Basel)*. 2021;9(1).
- 435 4. Wallace M, Moulia D, Blain AE, Ricketts EK, Minhaj FS, Link-Gelles R, et al. The Advisory  
436 Committee on Immunization Practices' Recommendation for Use of Moderna COVID-19 Vaccine  
437 in Adults Aged  $\geq 18$  Years and Considerations for Extended Intervals for Administration of  
438 Primary Series Doses of mRNA COVID-19 Vaccines - United States, February 2022. *MMWR Morb*  
439 *Mortal Wkly Rep*. 2022;71(11):416-21.
- 440 5. Oster ME, Shay DK, Su JR, Gee J, Creech CB, Broder KR, et al. Myocarditis Cases Reported  
441 After mRNA-Based COVID-19 Vaccination in the US From December 2020 to August 2021. *JAMA*.  
442 2022;327(4):331-40.
- 443 6. Chapin-Bardales J, Gee J, Myers T. Reactogenicity Following Receipt of mRNA-Based  
444 COVID-19 Vaccines. *JAMA*. 2021;325(21):2201-2.
- 445 7. Blumenthal KG, Freeman EE, Saff RR, Robinson LB, Wolfson AR, Foreman RK, et al. Delayed  
446 Large Local Reactions to mRNA-1273 Vaccine against SARS-CoV-2. *N Engl J Med*.  
447 2021;384(13):1273-7.
- 448 8. Johnston MS, Galan A, Watsky KL, Little AJ. Delayed Localized Hypersensitivity Reactions  
449 to the Moderna COVID-19 Vaccine: A Case Series. *JAMA Dermatol*. 2021;157(6):716-20.
- 450 9. Stone CA, Jr., Rukasin CRF, Beachkofsky TM, Phillips EJ. Immune-mediated adverse  
451 reactions to vaccines. *Br J Clin Pharmacol*. 2019;85(12):2694-706.
- 452 10. Chen BM, Cheng TL, Roffler SR. Polyethylene Glycol Immunogenicity: Theoretical, Clinical,  
453 and Practical Aspects of Anti-Polyethylene Glycol Antibodies. *ACS Nano*. 2021;15(9):14022-48.
- 454 11. Klimek L, Novak N, Cabanillas B, Jutel M, Bousquet J, Akdis CA. Allergenic components of  
455 the mRNA-1273 vaccine for COVID-19: Possible involvement of polyethylene glycol and IgG-  
456 mediated complement activation. *Allergy*. 2021;76(11):3307-13.

- 457 12. Dooling K, McClung N, Chamberland M, Marin M, Wallace M, Bell BP, et al. The Advisory  
458 Committee on Immunization Practices' Interim Recommendation for Allocating Initial Supplies of  
459 COVID-19 Vaccine - United States, 2020. *MMWR Morb Mortal Wkly Rep.* 2020;69(49):1857-9.
- 460 13. Caballero ML, Krantz MS, Quirce S, Phillips EJ, Stone CA, Jr. Hidden Dangers: Recognizing  
461 Excipients as Potential Causes of Drug and Vaccine Hypersensitivity Reactions. *J Allergy Clin*  
462 *Immunol Pract.* 2021;9(8):2968-82.
- 463 14. Hershfield MS, Ganson NJ, Kelly SJ, Scarlett EL, Jaggars DA, Sundry JS. Induced and pre-  
464 existing anti-polyethylene glycol antibody in a trial of every 3-week dosing of pegloticase for  
465 refractory gout, including in organ transplant recipients. *Arthritis Res Ther.* 2014;16(2):R63.
- 466 15. Armstrong JK, Hempel G, Koling S, Chan LS, Fisher T, Meiselman HJ, et al. Antibody against  
467 poly(ethylene glycol) adversely affects PEG-asparaginase therapy in acute lymphoblastic  
468 leukemia patients. *Cancer.* 2007;110(1):103-11.
- 469 16. Freyn AW, Ramos da Silva J, Rosado VC, Bliss CM, Pine M, Mui BL, et al. A Multi-Targeting,  
470 Nucleoside-Modified mRNA Influenza Virus Vaccine Provides Broad Protection in Mice. *Mol Ther.*  
471 2020;28(7):1569-84.
- 472 17. Freyn AW, Pine M, Rosado VC, Benz M, Muramatsu H, Beattie M, et al. Antigen  
473 modifications improve nucleoside-modified mRNA-based influenza virus vaccines in mice. *Mol*  
474 *Ther Methods Clin Dev.* 2021;22:84-95.
- 475 18. Baiersdorfer M, Boros G, Muramatsu H, Mahiny A, Vlatkovic I, Sahin U, et al. A Facile  
476 Method for the Removal of dsRNA Contaminant from In Vitro-Transcribed mRNA. *Mol Ther*  
477 *Nucleic Acids.* 2019;15:26-35.
- 478 19. Sternfeld M, Finkelstein Y, Hai E, Hod I. Tension headache treated by anti-inflammatory  
479 drug injected into GB 20 acupuncture point. *Am J Chin Med.* 1986;14(3-4):171-4.
- 480 20. Amanat F, Stadlbauer D, Strohmeier S, Nguyen THO, Chromikova V, McMahon M, et al. A  
481 serological assay to detect SARS-CoV-2 seroconversion in humans. *Nat Med.* 2020;26(7):1033-6.
- 482 21. Stadlbauer D, Tan J, Jiang K, Hernandez MM, Fabre S, Amanat F, et al. Repeated cross-  
483 sectional sero-monitoring of SARS-CoV-2 in New York City. *Nature.* 2021;590(7844):146-50.
- 484 22. Carreno JM, Alshammary H, Singh G, Raskin A, Amanat F, Amoako A, et al. Evidence for  
485 retained spike-binding and neutralizing activity against emerging SARS-CoV-2 variants in serum  
486 of COVID-19 mRNA vaccine recipients. *EBioMedicine.* 2021;73:103626.
- 487 23. Frujtier-Polloth C. Safety assessment on polyethylene glycols (PEGs) and their derivatives  
488 as used in cosmetic products. *Toxicology.* 2005;214(1-2):1-38.
- 489 24. Richter AW, Akerblom E. Antibodies against polyethylene glycol produced in animals by  
490 immunization with monomethoxy polyethylene glycol modified proteins. *Int Arch Allergy Appl*  
491 *Immunol.* 1983;70(2):124-31.
- 492 25. Ganson NJ, Kelly SJ, Scarlett E, Sundry JS, Hershfield MS. Control of hyperuricemia in  
493 subjects with refractory gout, and induction of antibody against poly(ethylene glycol) (PEG), in a  
494 phase I trial of subcutaneous PEGylated urate oxidase. *Arthritis Res Ther.* 2006;8(1):R12.
- 495 26. Longo N, Harding CO, Burton BK, Grange DK, Vockley J, Wasserstein M, et al. Single-dose,  
496 subcutaneous recombinant phenylalanine ammonia lyase conjugated with polyethylene glycol in  
497 adult patients with phenylketonuria: an open-label, multicentre, phase 1 dose-escalation trial.  
498 *Lancet.* 2014;384(9937):37-44.



499 27. Sundy JS, Ganson NJ, Kelly SJ, Scarlett EL, Rehrig CD, Huang W, et al. Pharmacokinetics  
500 and pharmacodynamics of intravenous PEGylated recombinant mammalian urate oxidase in  
501 patients with refractory gout. *Arthritis Rheum.* 2007;56(3):1021-8.

502 28. Yang Q, Lai SK. Anti-PEG immunity: emergence, characteristics, and unaddressed  
503 questions. *Wiley Interdiscip Rev Nanomed Nanobiotechnol.* 2015;7(5):655-77.

504 29. Warren CM, Snow TT, Lee AS, Shah MM, Heider A, Blomkalns A, et al. Assessment of  
505 Allergic and Anaphylactic Reactions to mRNA COVID-19 Vaccines With Confirmatory Testing in a  
506 US Regional Health System. *JAMA Netw Open.* 2021;4(9):e2125524.

507 30. Chang CJ, Chen CH, Chen BM, Su YC, Chen YT, Hershfield MS, et al. A genome-wide  
508 association study identifies a novel susceptibility locus for the immunogenicity of polyethylene  
509 glycol. *Nat Commun.* 2017;8(1):522.

510 31. Sherman MR, Williams LD, Sobczyk MA, Michaels SJ, Saifer MG. Role of the methoxy  
511 group in immune responses to mPEG-protein conjugates. *Bioconjug Chem.* 2012;23(3):485-99.

512 32. Cheng TL, Cheng CM, Chen BM, Tsao DA, Chuang KH, Hsiao SW, et al. Monoclonal  
513 antibody-based quantitation of poly(ethylene glycol)-derivatized proteins, liposomes, and  
514 nanoparticles. *Bioconjug Chem.* 2005;16(5):1225-31.

515 33. Tsai NM, Cheng TL, Roffler SR. Sensitive measurement of polyethylene glycol-modified  
516 proteins. *Biotechniques.* 2001;30(2):396-402.

517 34. Su YC, Chen BM, Chuang KH, Cheng TL, Roffler SR. Sensitive quantification of PEGylated  
518 compounds by second-generation anti-poly(ethylene glycol) monoclonal antibodies. *Bioconjug*  
519 *Chem.* 2010;21(7):1264-70.

520 35. Risma KA, Edwards KM, Hummell DS, Little FF, Norton AE, Stallings A, et al. Potential  
521 mechanisms of anaphylaxis to COVID-19 mRNA vaccines. *J Allergy Clin Immunol.*  
522 2021;147(6):2075-82 e2.

523  
524  
525  
526  
527  
528  
529  
530  
531  
532  
533  
534  
535  
536  
537  
538  
539  
540  
541  
542

543 **Table 1.** Components of mRNA-1273 and BNT162b2 formulations.

|                    | mRNA-1273                                                                                     | BNT162b2                                                                                                                                                                      |
|--------------------|-----------------------------------------------------------------------------------------------|-------------------------------------------------------------------------------------------------------------------------------------------------------------------------------|
| Nucleic acid       | messenger ribonucleic acid (mRNA)                                                             | messenger ribonucleic acid (mRNA)                                                                                                                                             |
| Lipidic components | SM-102                                                                                        | ALC 315                                                                                                                                                                       |
|                    | polyethylene glycol [PEG] 2000<br>dimyristoyl glycerol [DMG]                                  | 2 [(polyethylene glycol)-2000]-N,N-ditetradecylacetamide                                                                                                                      |
|                    | Cholesterol                                                                                   | Cholesterol                                                                                                                                                                   |
|                    | 1,2-distearoyl-sn-glycero-3-phosphocholine [DSPC]                                             | 1,2-Distearoyl-sn-glycero-3-phosphocholine [DSPC]                                                                                                                             |
| Other components   | Tromethamine, tromethamine hydrochloride, acetic acid, sodium acetate trihydrate, and sucrose | Tromethamine, tromethamine hydrochloride, and sucrose or* potassium chloride, monobasic potassium phosphate, sodium chloride, dibasic sodium phosphate dihydrate, and sucrose |

\*BNT162b2 vaccine for individuals 12 years of age and older contain one of the two sets of additional ingredients

544  
545  
546  
547  
548  
549  
550  
551  
552  
553  
554  
555  
556  
557  
558  
559  
560  
561  
562  
563  
564

565 **Table 2.** Geometric means of AUC and AUC fold change for each ELISA antigen.

|                                     | Timepoint/<br>vaccine | Geometric mean AUCs  |                       | Geometric mean AUC fold<br>change |                        |
|-------------------------------------|-----------------------|----------------------|-----------------------|-----------------------------------|------------------------|
|                                     |                       | BNT162b2<br>G.M. AUC | mRNA-1273<br>G.M. AUC | BNT162b2<br>(G.M.F.I)             | mRNA-1273<br>(G.M.F.I) |
| <b>Spike</b>                        | Prime                 | 1569.32              | 2043.64               | 313.86                            | 408.73                 |
|                                     | Boost                 | 7405.92              | 7974.32               | 1481.18                           | 1594.86                |
| <b>BNT162b2 LNP</b>                 | Prime                 | 0.54                 | 1.54                  | 0.92                              | 2.25                   |
|                                     | Boost                 | 0.58                 | 7.04                  | 1.07                              | 4.28                   |
| <b>mRNA-1273<br/>LNP</b>            | Prime                 | 0.55                 | 1.84                  | 1.1                               | 2.6                    |
|                                     | Boost                 | 0.66                 | 8.62                  | 1.32                              | 12.2                   |
| <b>Nonspecific LNP</b>              | Prime                 | 8.98                 | 27.44                 | 1.1                               | 3.54                   |
|                                     | Boost                 | 9.6                  | 49.39                 | 1.07                              | 2.12                   |
| <b>PEGylated BSA</b>                | Prime                 | 10.01                | 49.64                 | 1.26                              | 5.06                   |
|                                     | Boost                 | 8.87                 | 169.14                | 1.11                              | 17.25                  |
| <b>Low molecular<br/>weight PEG</b> | Prime                 | 0.5                  | 0.89                  | 1                                 | 1.78                   |
|                                     | Boost                 | 0.61                 | 1.78                  | 1.22                              | 9.29                   |
| <b>BSA</b>                          | Prime                 | 5.43                 | 5.38                  | 0.92                              | 0.96                   |
|                                     | Boost                 | 5.78                 | 8.06                  | 0.98                              | 1.44                   |

566  
 567 Geometric mean (G.M.) of all the area under the curve (AUC) values measured after the prime or the  
 568 boost are shown in the left panels. Geometric mean of fold induction (G.M.F.I) values, expressed as the  
 569 ratio between prime or boost AUCs and the baseline AUC for each of the participants is shown in the right  
 570 panels. Prime: First SARS-CoV-2 vaccine dose; Boost: Second SARS-CoV-2 vaccine dose

571  
 572  
 573  
 574  
 575  
 576  
 577  
 578  
 579  
 580  
 581  
 582  
 583  
 584  
 585  
 586  
 587  
 588

589 **Figure Legends**

590

591 **Figure 1. Antibodies against SARS-CoV-2 spike and mRNA-based vaccine formulations in**  
592 **vaccinees' sera.** Sera from BNT162b2 (left column) or mRNA-1273 (right column) vaccinees  
593 collected at baseline (n=10 for BNT162b2 and n=10 for mRNA-1273 groups), 18.9 days (arithmetic  
594 mean  $\pm$ 2.4 SD) after the prime (n=10 for BNT162b2 and n=10 for mRNA-1273 groups) and 19.3  
595 days (arithmetic mean  $\pm$ 3.9 SD) after the boost (n=10 for BNT162b2 and n=10 for mRNA-1273  
596 groups), were tested for IgG antibodies against SARS-CoV-2 full-length spike (**A** and **B**), BNT162b2  
597 mRNA LNPs (**C** and **E**), and mRNA-1273 mRNA LNPs (**D** and **F**) by ELISA. Dotted line represents the  
598 limit of detection (LOD) of the assay. Statistically significant differences between post-  
599 prime/post-boost vs baseline antibody levels are shown. One-way ANOVA with Tukey's multiple  
600 comparisons test. \*, P < 0.05; \*\*, P < 0.01; \*\*\*, P < 0.001; \*\*\*\*, P < 0.0001.

601

602 **Figure 2. Antibodies against irrelevant lipid nanoparticles (LNPs) and polyethylene glycol (PEG)**  
603 **in vaccinees' sera.** Sera from BNT162b2 (left column) or mRNA-1273 (right column) vaccinees  
604 collected at baseline (n=10 for BNT162b2 and n=10 for mRNA-1273 groups), 18.9 days (arithmetic  
605 mean  $\pm$ 2.4 SD) after the prime (n=10 for BNT162b2 and n=10 for mRNA-1273 groups) and 19.3  
606 days (arithmetic mean  $\pm$ 3.9 SD) after the boost (n=10 for BNT162b2 and n=10 for mRNA-1273  
607 groups), were tested for IgG antibodies against irrelevant LNPs (**A** and **B**), PEGylated BSA 20kDa  
608 (**C** and **D**), 3.35kDa PEG (**E** and **F**) by ELISA. Dotted line represents the limit of detection (LOD) of  
609 the assay. Statistically significant differences between post-prime/post-boost vs baseline  
610 antibody levels are shown. One-way ANOVA with Tukey's multiple comparisons test. \*, P < 0.05;  
611 \*\*, P < 0.01; \*\*\*, P < 0.001; \*\*\*\*, P < 0.0001.

612

613 **Figure 3. Correlation of polyethylene glycol (PEG) reactive antibodies among different assays.**  
614 Area under the curve (AUC) values obtained from the 20kDa PEGylated-BSA ELISA using mRNA-  
615 1273 sera were analyzed for correlation with BNT162b2 formulation specific IgG (**A**), mRNA-1273  
616 formulation specific IgG (**B**), irrelevant LNPs IgG (**C**), and PEG 3.35kDa specific IgG (**D**). Pearson  
617 correlation was used. Statistically significant differences between post-prime/post-boost vs  
618 baseline antibody levels are shown. One-way ANOVA with Tukey's multiple comparisons test. \*,  
619 P < 0.05; \*\*, P < 0.01; \*\*\*, P < 0.001; \*\*\*\*, P < 0.0001.

620

621 **Figure 4. Levels of IgM and IgE antibodies against PEG and specificity of anti-PEG ELISA.** Sera  
622 from BNT162b2 (left column) or mRNA-1273 (right column) vaccinees collected at baseline (n=10  
623 for BNT162b2 and n=10 for mRNA-1273 groups), 18.9 days (arithmetic mean  $\pm$ 2.4 SD) after the  
624 prime (n=10 for BNT162b2 and n=10 for mRNA-1273 groups) and 19.3 days (arithmetic mean  
625  $\pm$ 3.9 SD) after the boost (n=10 for BNT162b2 and n=10 for mRNA-1273 groups), were tested for  
626 IgM (**A** and **B**) or IgE (**C** and **D**) antibodies against PEGylated BSA 20kDa or against bovine serum  
627 albumin (BSA, **E** and **F**). Statistically significant differences between post-prime/post-boost vs  
628 baseline antibody levels are shown. One-way ANOVA with Tukey's multiple comparisons test. \*,  
629 P < 0.05; \*\*, P < 0.01; \*\*\*, P < 0.001; \*\*\*\*, P < 0.0001.

630

631 **Figure 5. Polyethylene glycol (PEG) antibodies in participants selected based on their vaccine**  
632 **associated side effects including delayed onset injection site reactions and severe allergic**

633 **reaction.** Sera from BNT162b2 (**A**) or mRNA-1273 (**B**) vaccinees was collected at baseline (n=28  
634 for **A and C**, and n=19 for **B and D**), 14.5 days (arithmetic mean  $\pm$ 4.8 SD) after the prime (n=23  
635 for **A and C**, and n=17 for **B and D**) or 25.2 days (arithmetic mean  $\pm$ 11.6 SD) after the boost (n=26  
636 for **A and C** and n=17 for **B and D**), and tested for IgG (**A and B**), IgM (**C and D**) or IgE (**E and F**)  
637 antibodies against 20kDa PEGylated BSA by ELISA. Dotted line represents the limit of detection  
638 (LoD) of the assay. Statistically significant differences between post-prime/post-boost vs baseline  
639 antibody levels are shown. One-way ANOVA with Tukey's multiple comparisons test. \*, P < 0.05;  
640 \*\*, P < 0.01; \*\*\*, P < 0.001; \*\*\*\*, P < 0.0001.

641  
642 **Supplementary Figure 1. Correlation of polyethylene glycol (PEG) reactive antibodies among**  
643 **different assays (by vaccination time point).** Area under the curve (AUC) values obtained from  
644 the 20kDa PEGylated-BSA ELISA using mRNA-1273 sera were analyzed for correlation with  
645 BNT162b2 formulation specific IgG, mRNA-1273 formulation specific IgG, irrelevant LNPs IgG, and  
646 3.35KDa PEG specific IgG, at baseline (left column), after the first vaccine dose administration  
647 (central column) or after the boost (right column). Pearson correlation was used.

648  
649 **Supplementary Figure 2. Controls used for measurement of IgE antibodies and for BSA ELISAs.**  
650 The positive control used for measurement of antigen-specific IgE is shown in **A**. The positive  
651 control used for measurement of BSA specific IgG is shown in **B**.

Figure 1

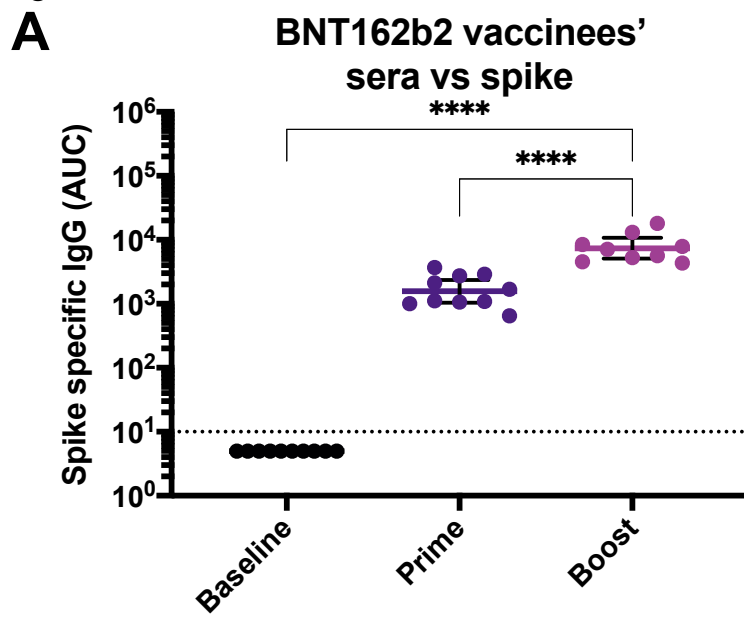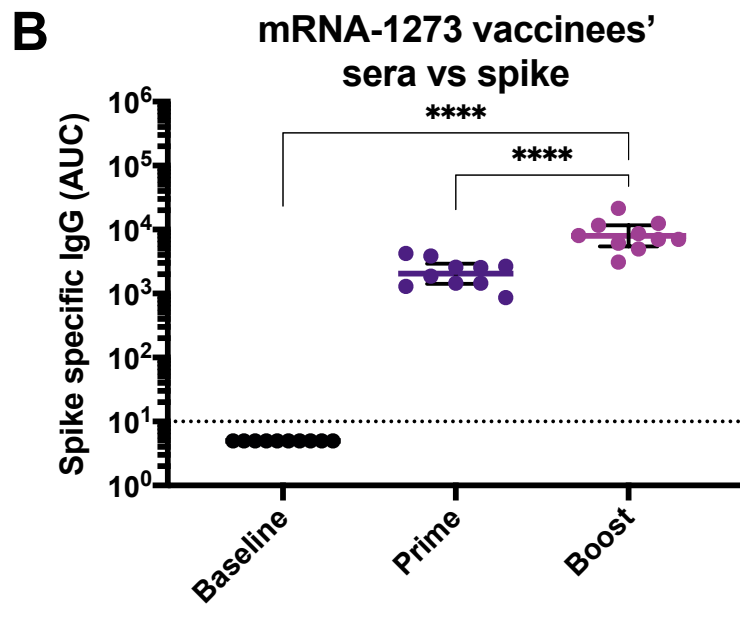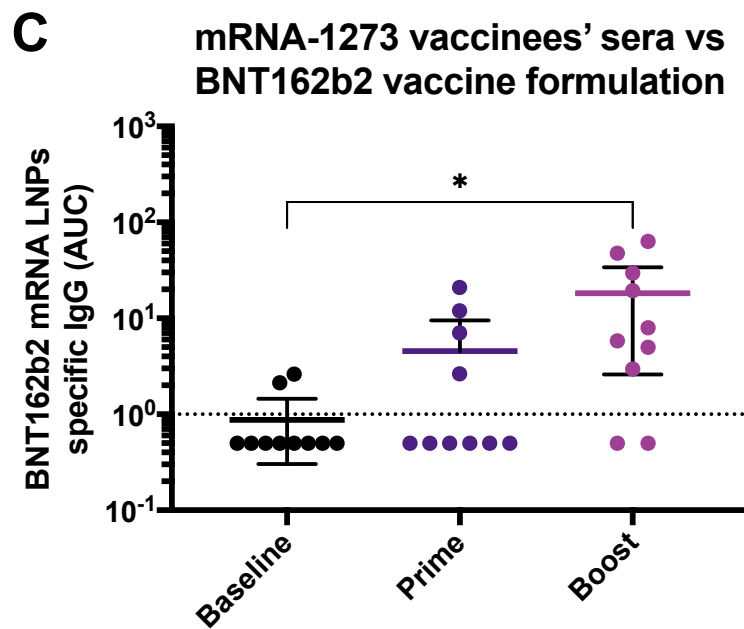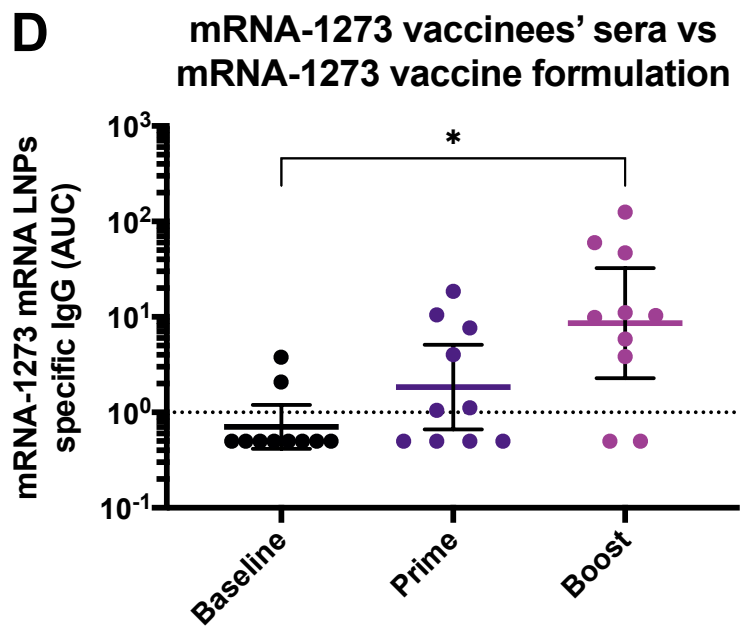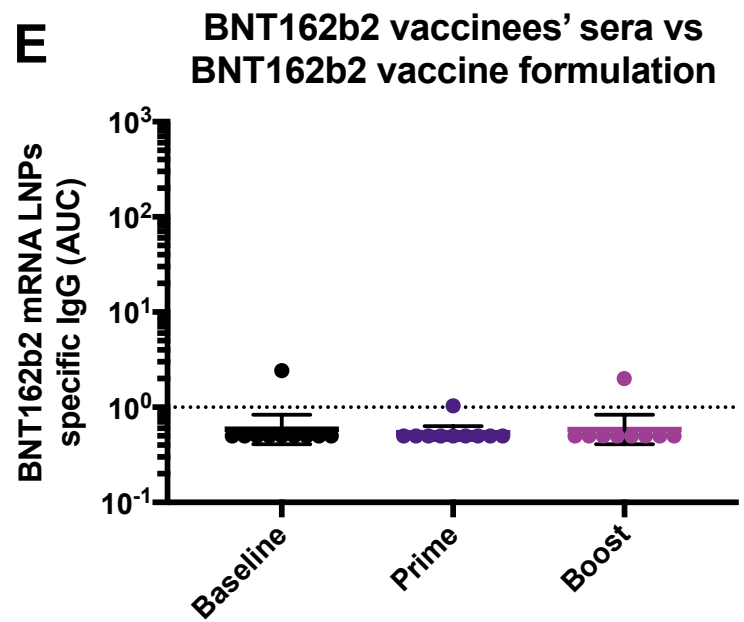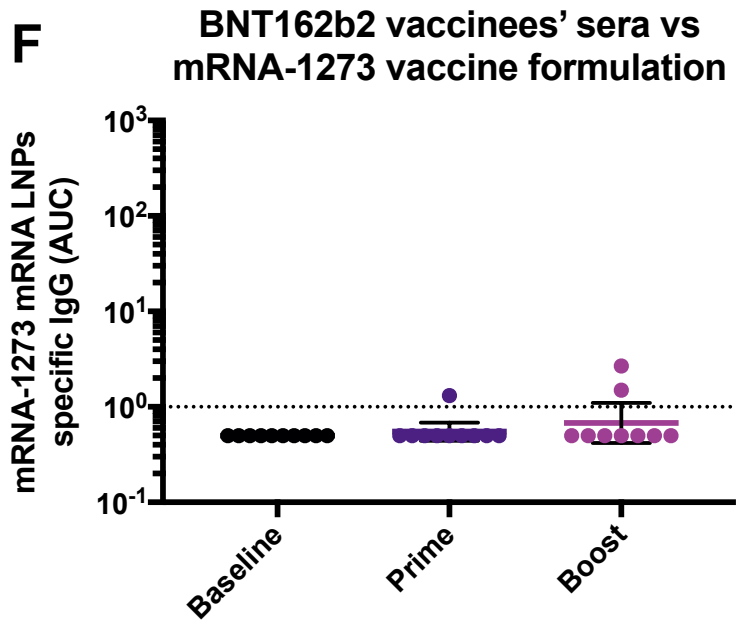

Figure 2

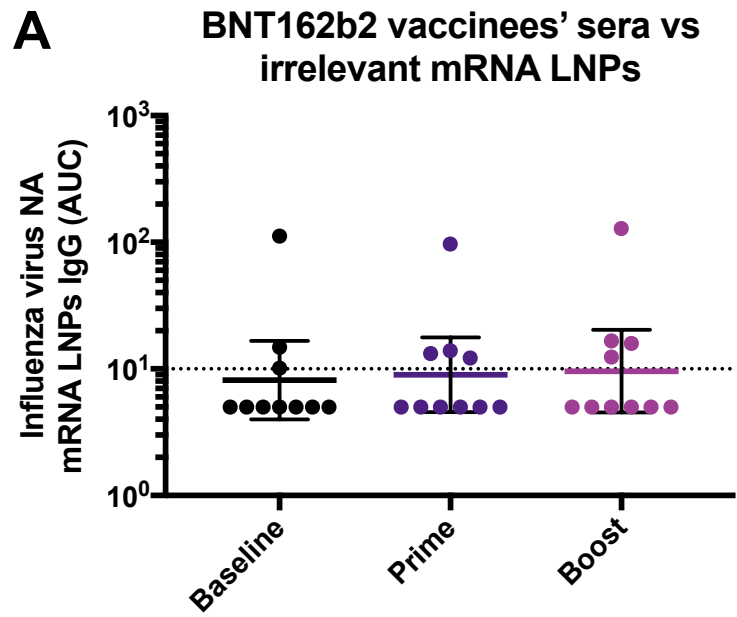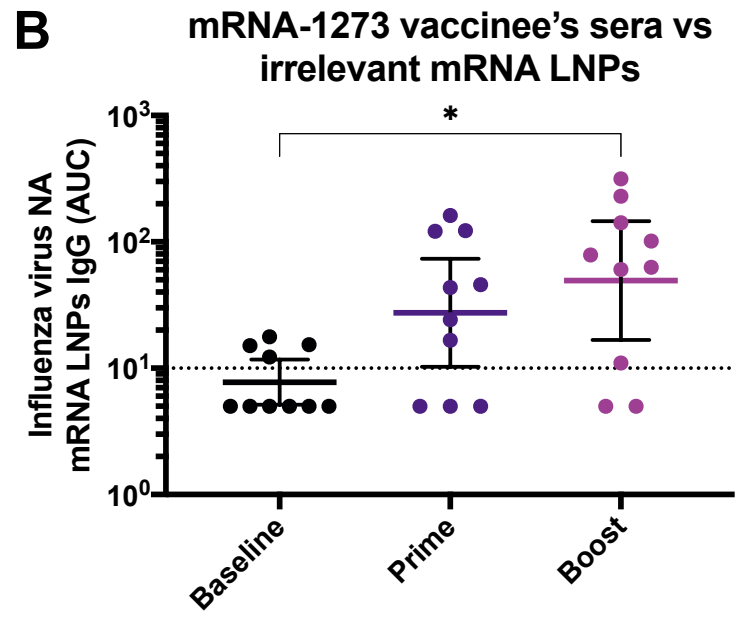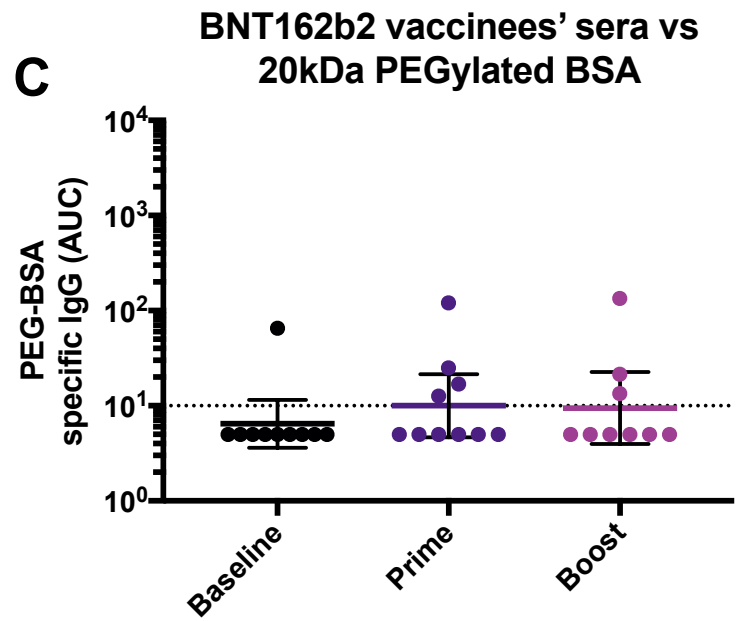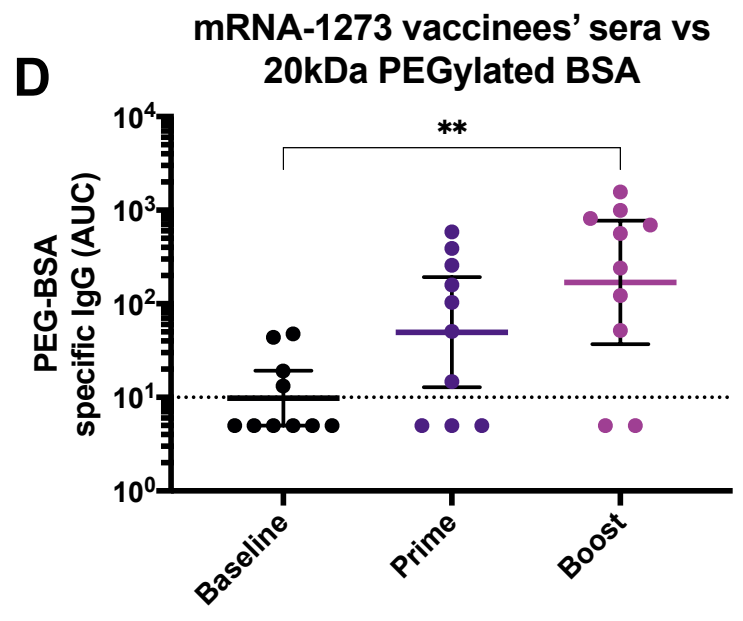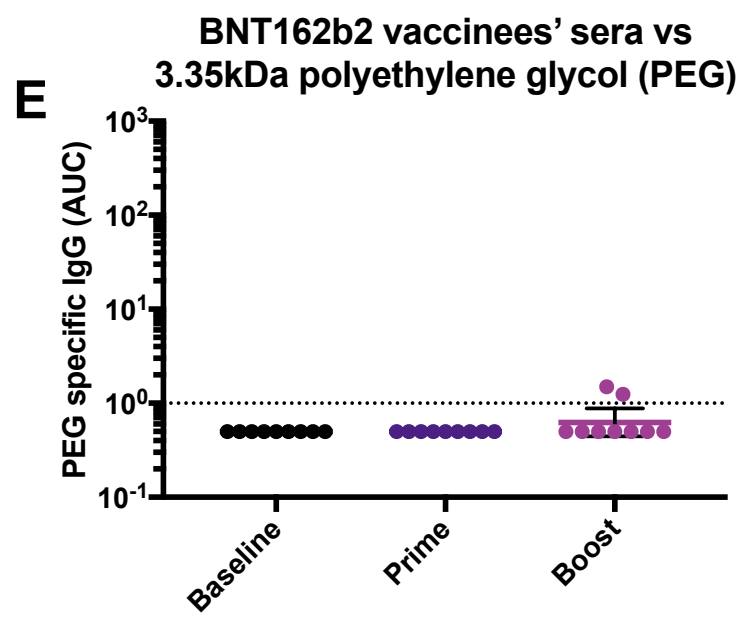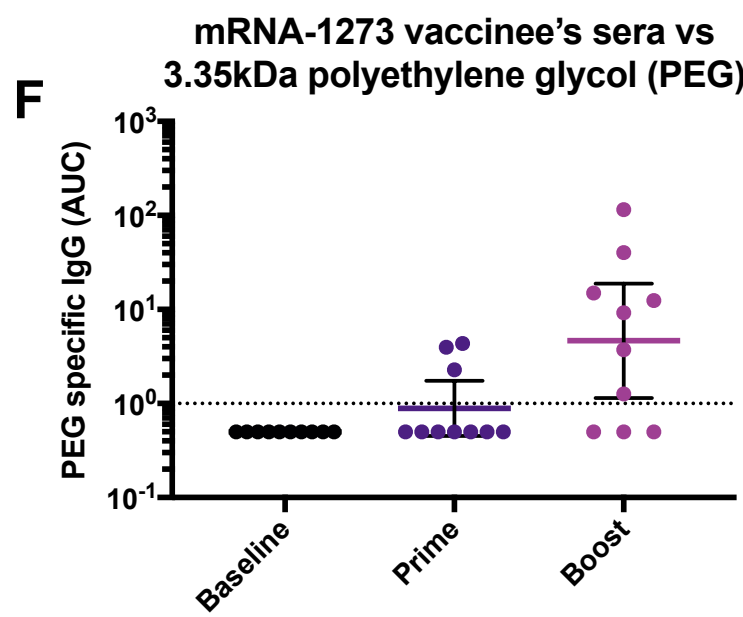

Figure 3

**A**

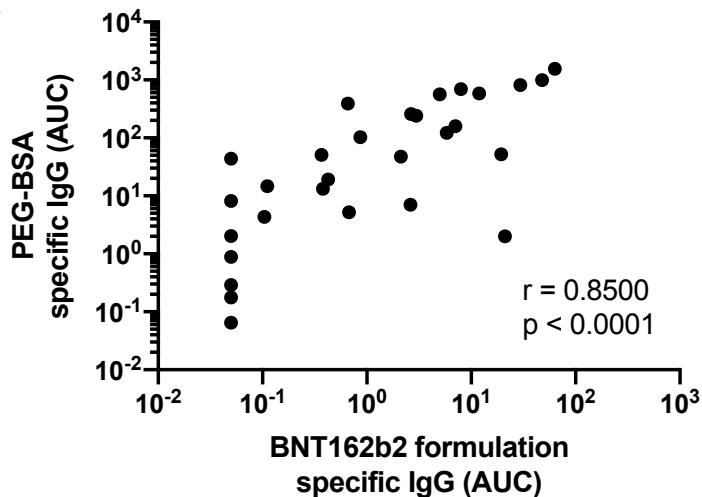

**B**

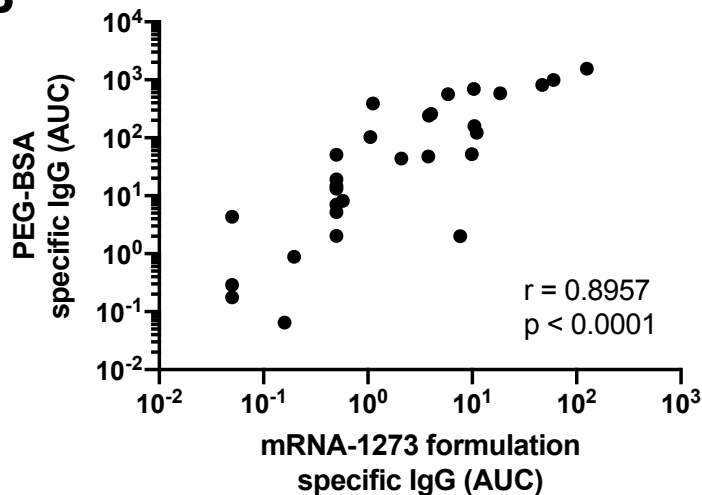

**C**

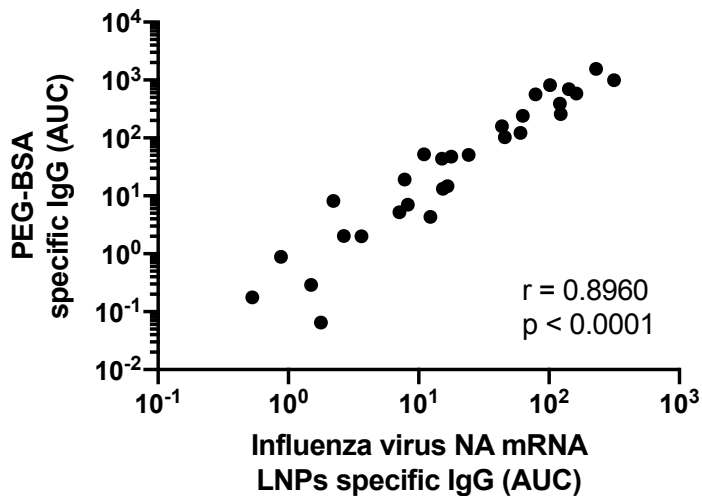

**D**

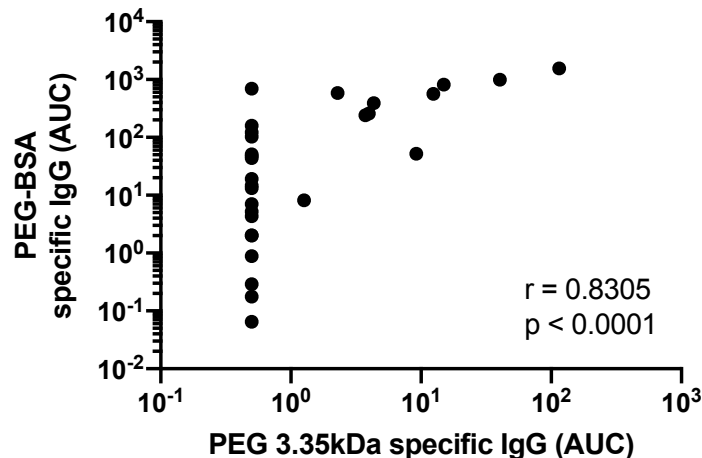



Figure 4

It is made available under a [CC-BY-NC-ND 4.0 International license](https://creativecommons.org/licenses/by-nc-nd/4.0/).

**A**

**BNT162b2 vaccinees' sera vs  
20kDa PEGylated BSA**

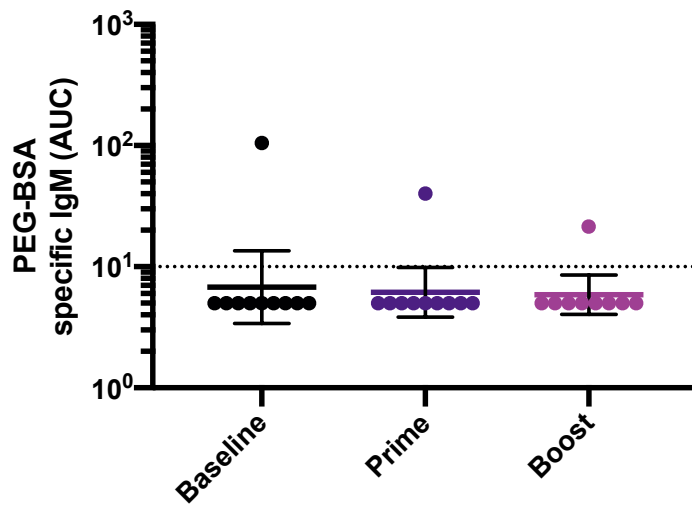

**B**

**mRNA-1273 vaccinees' sera vs  
20kDa PEGylated BSA**

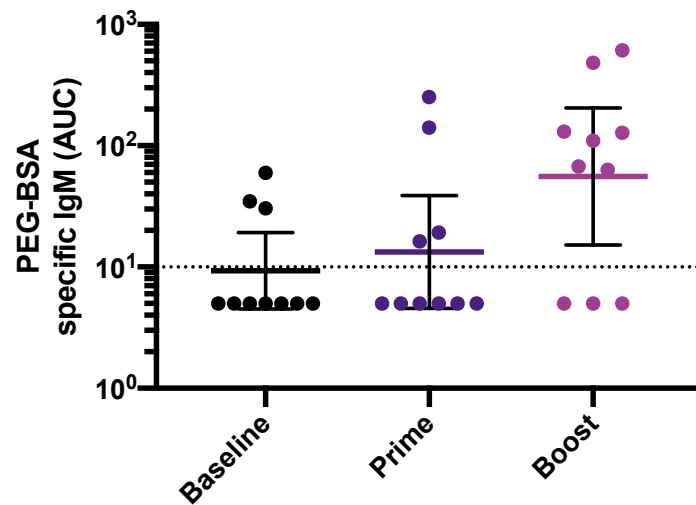

**C**

**BNT162b2 vaccinees' sera vs  
20kDa PEGylated BSA**

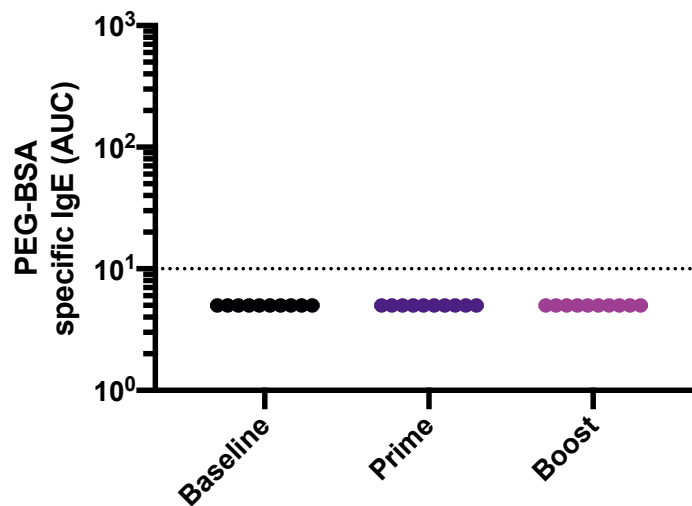

**D**

**mRNA-1273 vaccinees' sera vs  
20kDa PEGylated BSA**

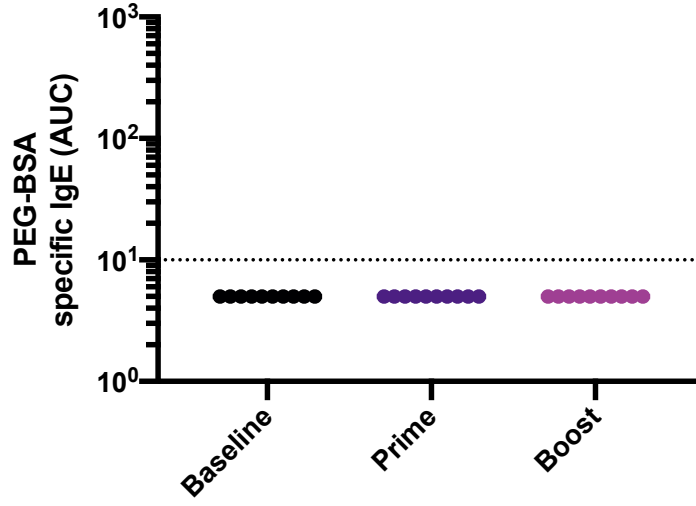

**E**

**BNT162b2 vaccinees' sera vs  
bovine serum albumin (BSA)**

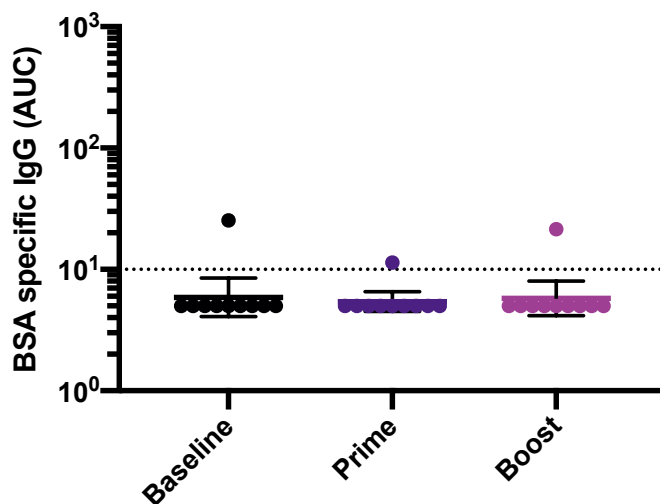

**F**

**mRNA-1273 vaccinees' sera vs  
bovine serum albumin (BSA)**

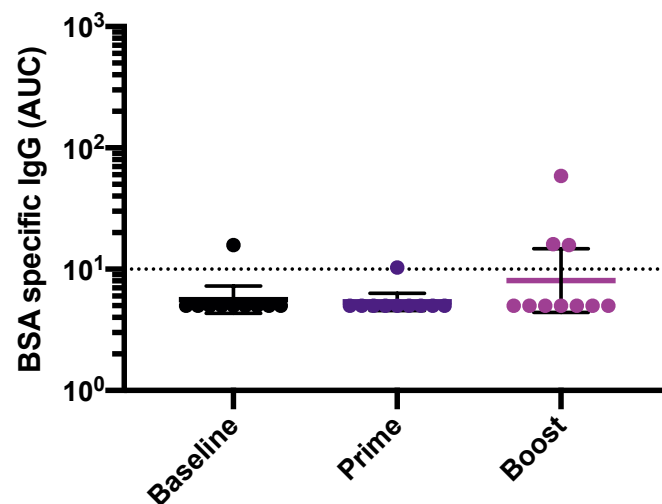

Figure 5

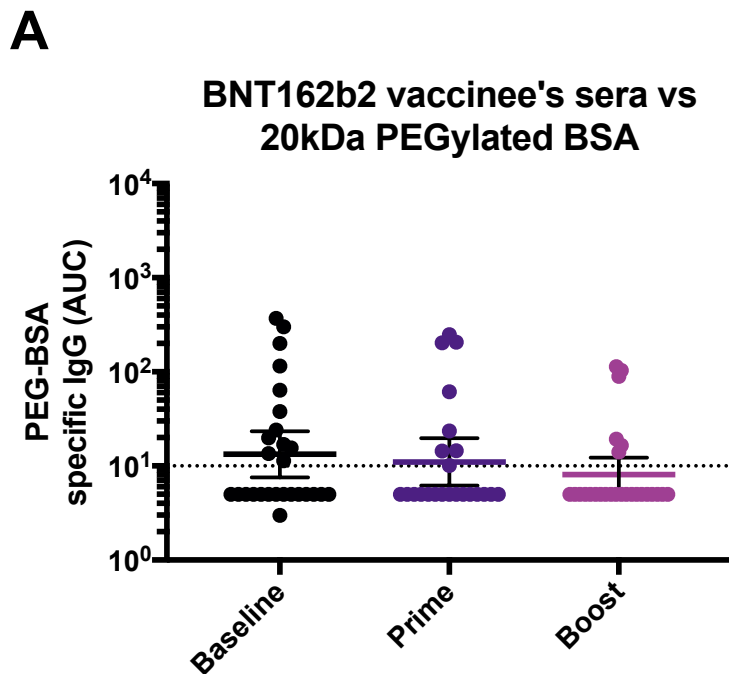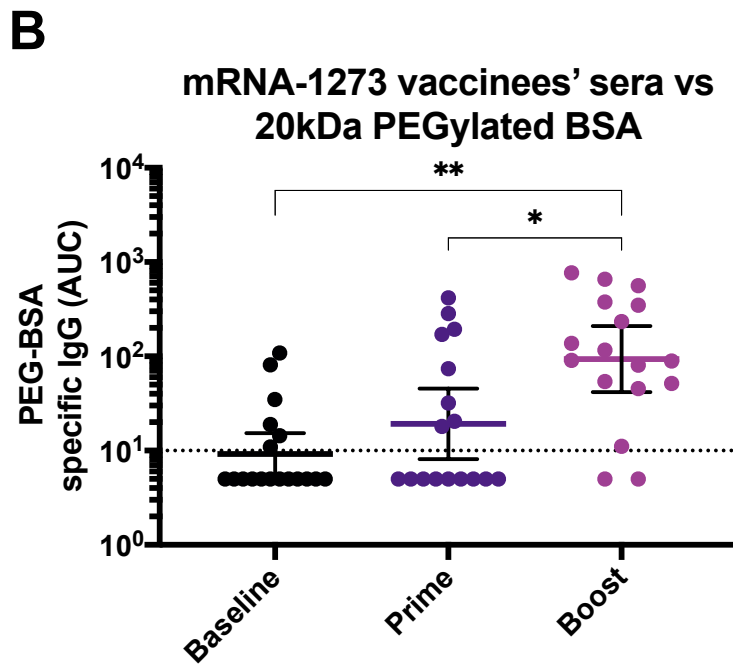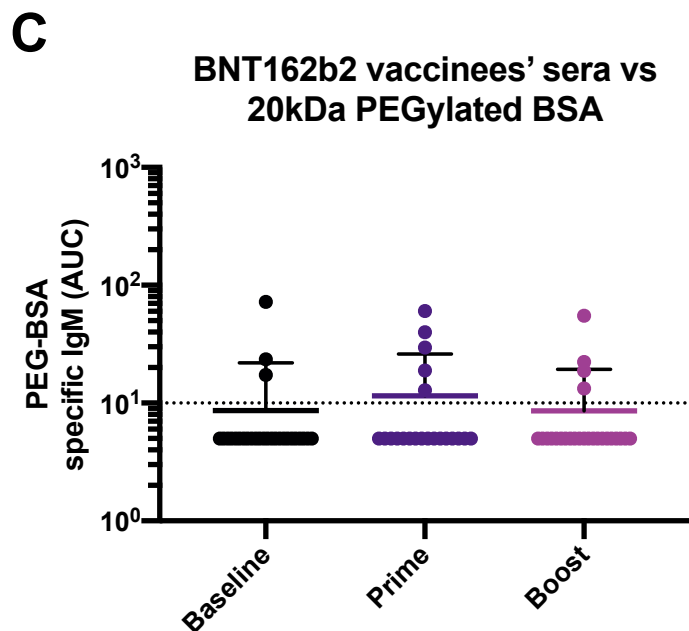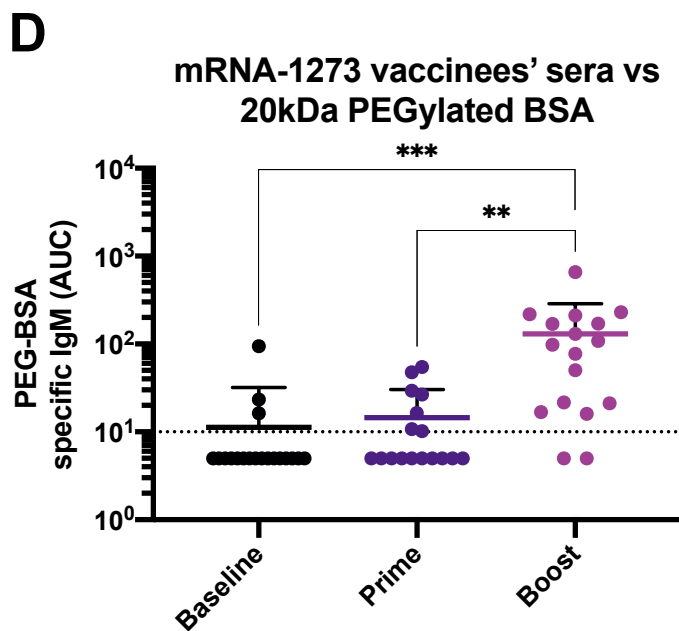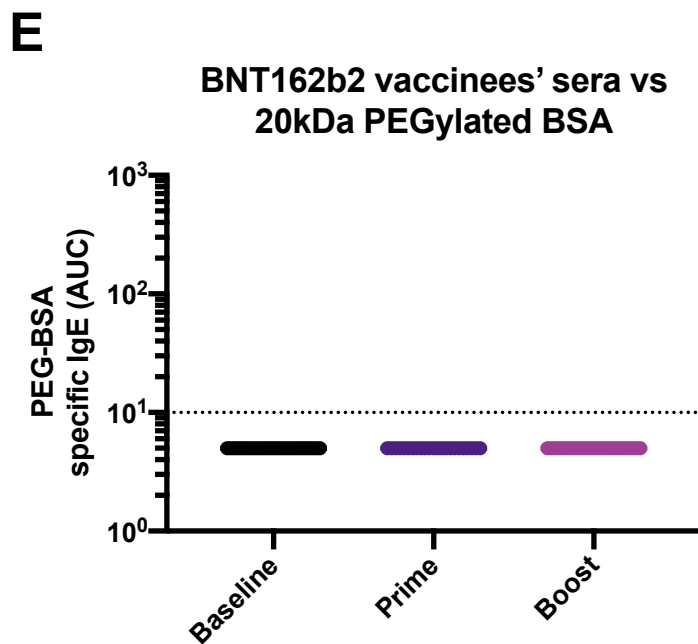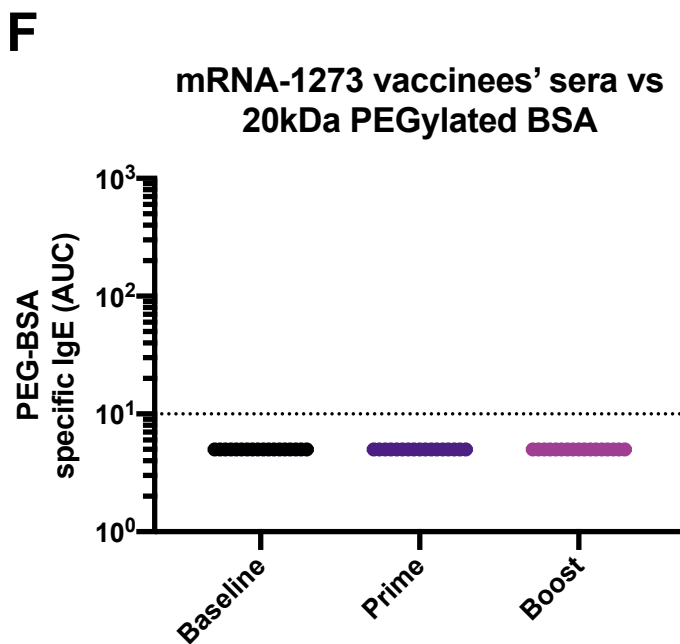

Source: https://medrxiv.org/content/medrxiv/early/2022/04/17/2022.04.15.22273914.full.pdf
