# Supplementary material for: mRNA-1273 but not BNT162b2 induces antibodies against polyethylene glycol (PEG) contained in mRNA-based vaccine formulations
Source: bioRxiv or medRxiv preprint supplement (doi:10.1101/2022.04.15.22273914), 2022-04-17

# Supplementary figure 1

## Baseline

## Prime

## Boost

BNT162b2  
formulation

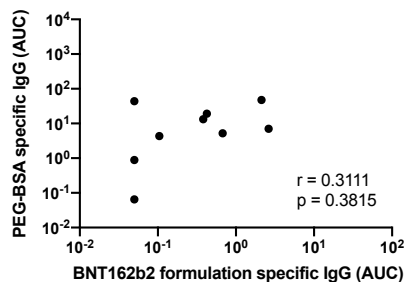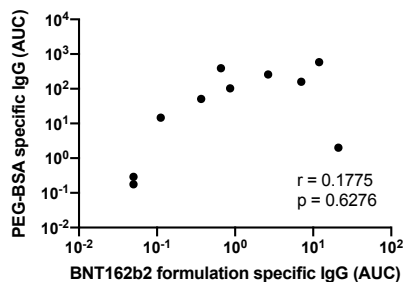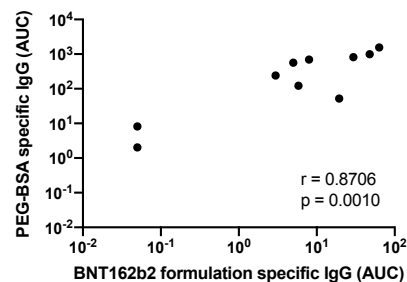

mRNA-1273  
formulation

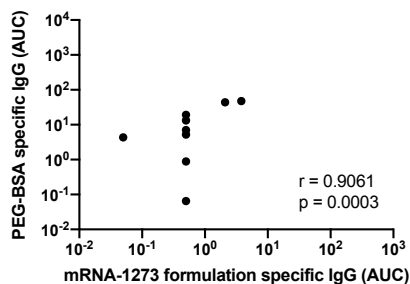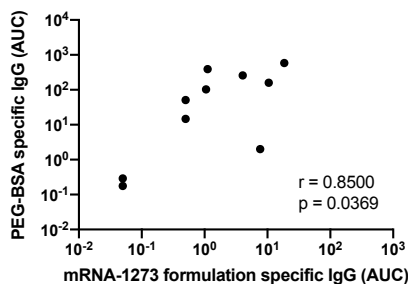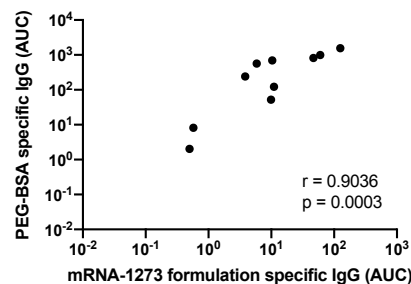

Non-specific  
LNPs

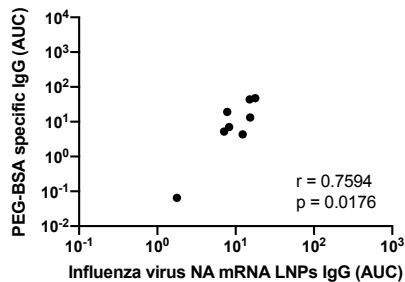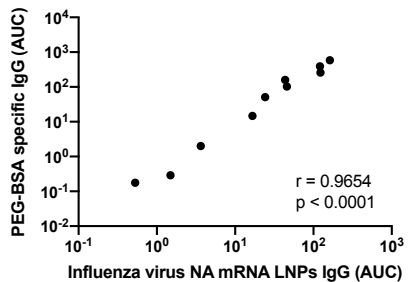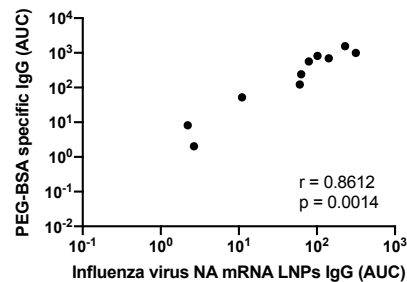

PEG

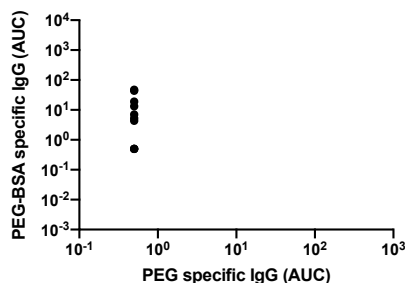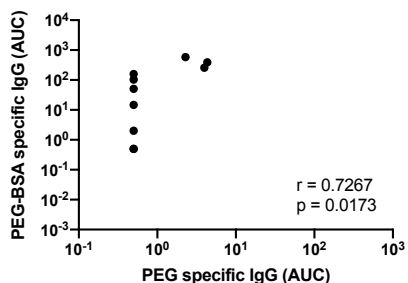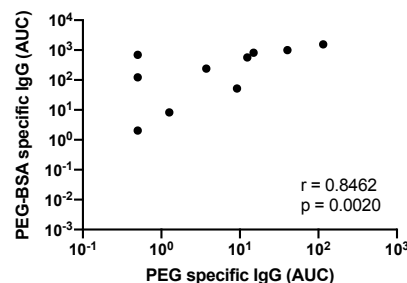

Supplementary figure 2

**A**

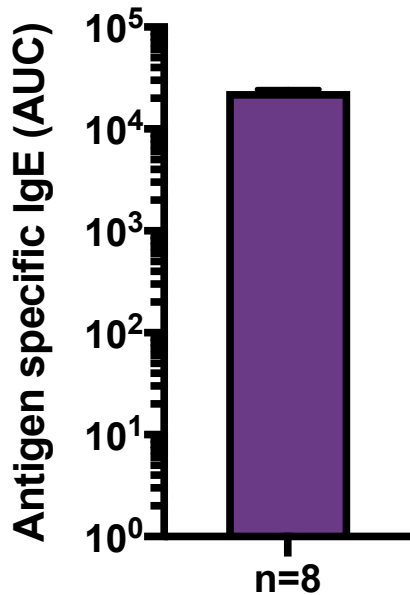

**B**

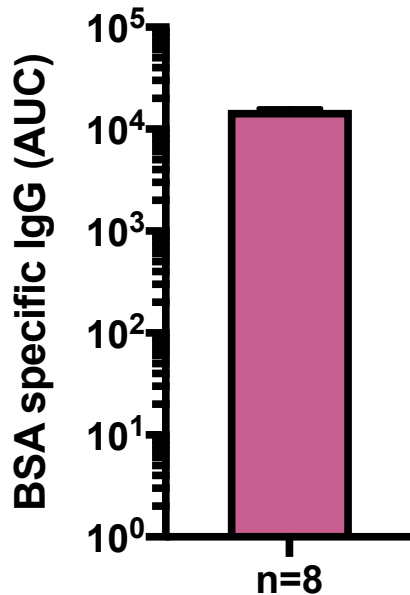

Supplement: Supplementary file [file media-1.pdf]
